# Supplementary material for: Assessment of 5-Year Outcomes of Life Satisfaction in Acute Respiratory Distress Syndrome Survivors After Rehabilitation Programs: A Prospective, Multicenter, Randomized Controlled Trial
Source: Research Square preprint supplement (doi:10.21203/rs.3.rs-733308/v1), 2021-08-12
Supplement: Supplementary file 1 [file 9718691d248e2dafe7e8c05c.docx]

Month 1 to month 42 (each month), and months 45, 48, 51, 54, 57, 60, 63, and 66)

Medical outcomes

in pre-intervention, measurement 2 (10-day post intervention), measurement 3 (three-month post measurement 2), and ten following ups includes six three-month periods (6, 9, 12, 15, 18, 21), four six-month periods (27, 33, 39, 45), and two twelve-month period (57, and 69) after intervention by deploying FCEM and CCM questionnaires.

**Instruments:**Quality-of-life (SF-36), Percieved stress (PSQ-14), State and Trait Anxiety Basthel Index (BI)Kessler Psychological Distress Scale (K10)Six-minute walk test (6MWT)

**Medical measures:** Physical examination, Pulmonary-function testing (PFT), Posterior-anterior and lateral (PA-Lat) chest radiography (CXR), Resting oximetry, A standardized 6MWT with continuous oximetry, Free walking test as long as the stamina and capability of patient, Laboratory tests as indicated

xx group sessions

xx patients

xxx hours

Stage 4: Evaluation

xx group sessions

xx patients

xxx hours

Stage 3: Acceptance

xx group sessions

3-5 patients

3-5 hours

Stage 2: Expectations

3-5 group sessions

3-5 patients

45-50 min

Stage 1: Awareness and cognition

POST INTERVENTION

INTERVENTION

PRE INTERVENTION

Visit with phycologist, psychiatrist and neurologist

**4. Control(n=35)**

**3. Researcher at trainer with CCM (n=35)**

**2. Intimate friend as trainer with FCEM (n=35)**

**1. Family-centered empowerment model and Continuous care model (n=35)**

Random Allocation Software ©

(n=286)

Consulted with a nurse and specialists

(1) Age ≥18 years

(2) informed consent

(3) willingness of designated family member or friend to participate

(4) has basic health literacy and can fill out questionnaire

(5) admitted to the ICU

(6) full code status (7) met ARDS criteria

Acute Respiratory Distress Symptom

Intensive Care Units (n=2)

2016

2007

Measures:

**Figure 1:** Three phases of study design

**Table1:** Multiple Cox survival analysis of better scores of Barthel index (BI) and Kessler psychological distress scale (KPDS) over five years

|  | **Measurement** | **HR** | **P value** | **Lower** | **Upper** |
| --- | --- | --- | --- | --- | --- |
| **Barthe Index** | **Group 4** | **Reference** | | | |
| **Group 1** | 87.652 | **<0.0001** | 20.575 | 373.406 |
| **Group 2** | 28.462 | **<0.0001** | 6.770 | 119.654 |
| **Group 3** | 29.226 | **<0.0001** | 6.983 | 122.317 |
| **Coexisting Illness First year, (No)** | **Reference** | | | |
| **Coexisting Illness First year, (One)** | 2.045 | **0.017** | 1.139 | 3.672 |
| **Coexisting Illness First year, (Two)** | 1.062 | **0.856** | 0.555 | 2.030 |
| **Coexisting Illness First year, (>Two)** | 1.070 | **0.803** | 0.628 | 1.825 |
| **KPDS Index** | **Group 4** | **Reference** | | | |
| **Group 1** | 2.179 | **0.048** | 1.103 | 4.454 |
| **Group 2** | 2.409 | **0.009** | 1.196 | 4.364 |
| **Group 3** | 0.615 | **0.264** | 0.258 | 1.416 |
| **Gender** | 1.322 | **0.233** | 0.824 | 2.061 |
| **BMI** | 0.845 | **0.139** | 0.896 | 1.071 |
| **Returned to work first year** | 0.684 | **0.170** | 0.418 | 1.232 |

| **A**  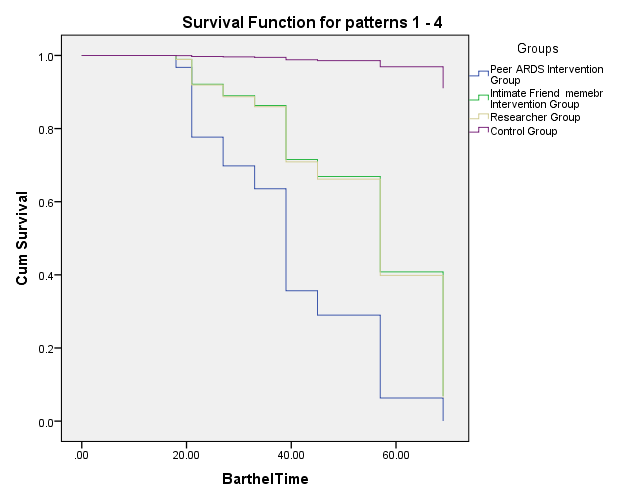 |
| --- |
| **B**  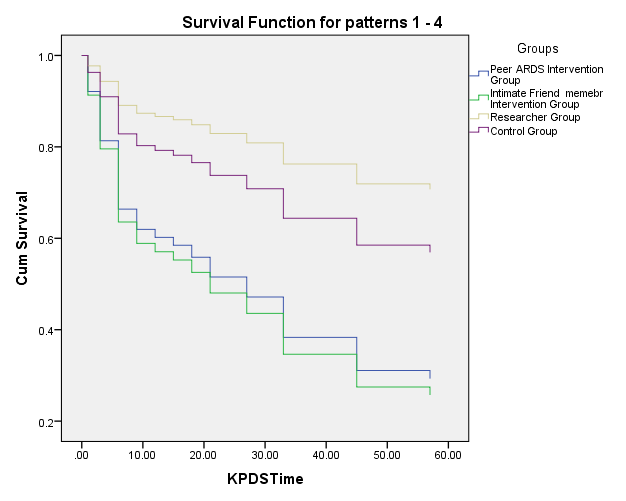 |

**Figure 2:** Multiple Cox survival analyses according to (A) Barthel index time and (B) Kessler Psychological Distress Scale (K10) time in four groups of study


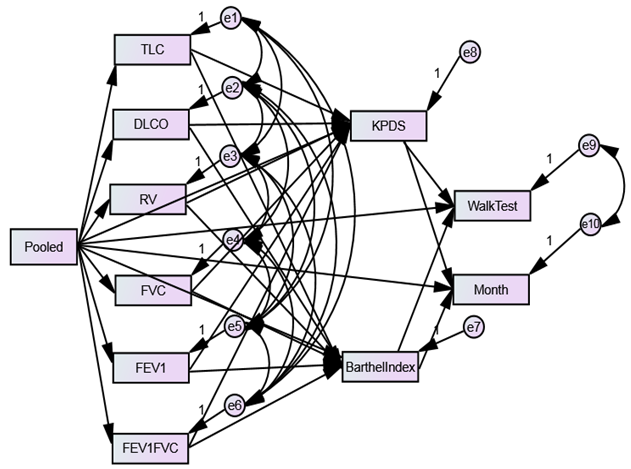


**Figure 3:**The Structural Education Modeling (SEM) for relationship between variables and waking index (WI) and Month as outcomes
